# Supplementary material for: Associations between N-Terminal Pro-B-Type Natriuretic Peptide, Body Fluid Imbalance and Quality of Life in Patients Undergoing Hemodialysis: A Cross-Sectional Study
Source: MDPI journal article supplement (doi:10.3390/jcm12237356), 2023-11-28
Supplement: s1 [file s1]

**Supplemental Table 3.** NT-proBNP as an independent factor associated with quality of life domains

| QoL domains                                                       | Unstandardized<br>B (95% CI) | Standardized<br>$\beta$ | P      |
|-------------------------------------------------------------------|------------------------------|-------------------------|--------|
| <i>Physical health domains</i>                                    |                              |                         |        |
| <b><i>Physical functioning</i></b>                                |                              |                         |        |
| Unadjusted                                                        | -10.08 (-15.19, -4.96)       | -0.21                   | <0.001 |
| Multivariable-adjusted <sup>1</sup>                               | -8.78 (-14.23, -3.32)        | -0.18                   | 0.002  |
| <b><i>Role limitations caused by physical health problems</i></b> |                              |                         |        |
| Unadjusted                                                        | -14.03 (-23.41, -4.64)       | -0.16                   | 0.004  |
| Multivariable-adjusted <sup>2</sup>                               | -10.59 (-20.56, -0.62)       | -0.12                   | 0.037  |
| <b><i>Bodily pain</i></b>                                         |                              |                         |        |
| Unadjusted                                                        | -7.46 (-13.33, -1.58)        | -0.14                   | 0.013  |
| Multivariable-adjusted <sup>3</sup>                               | -6.42 (-12.37, -0.48)        | -0.12                   | 0.034  |
| <b><i>General health</i></b>                                      |                              |                         |        |
| Unadjusted                                                        | -3.82 (-7.67, 0.04)          | -0.11                   | 0.05   |
| Multivariable-adjusted <sup>4</sup>                               | -5.43 (-9.42, -1.45)         | -0.15                   | 0.008  |
| <i>Mental health domains</i>                                      |                              |                         |        |
| <b><i>Vitality</i></b>                                            |                              |                         |        |
| Unadjusted                                                        | -5.79 (-10.87, -0.71)        | -0.12                   | 0.026  |
| Multivariable-adjusted <sup>5</sup>                               | -4.93 (-10.24, 0.39)         | -0.11                   | 0.07   |
| <b><i>Social functioning</i></b>                                  |                              |                         |        |
| Unadjusted                                                        | -4.68 (-10.94, 1.57)         | -0.08                   | 0.14   |
| Multivariable-adjusted <sup>6</sup>                               | -3.97 (-10.45, 2.51)         | -0.07                   | 0.07   |
| <b><i>Role limitations caused by emotional health problem</i></b> |                              |                         |        |
| Unadjusted                                                        | -13.17 (-22.86, -3.48)       | -0.15                   | 0.008  |
| Multivariable-adjusted <sup>7</sup>                               | -10.60 (-20.70, -0.49)       | -0.12                   | 0.040  |
| <b><i>Emotional well-being</i></b>                                |                              |                         |        |
| Unadjusted                                                        | -6.05 (-11.04, -1.06)        | -0.13                   | 0.018  |
| Multivariable-adjusted <sup>8</sup>                               | -6.05 (-11.04, -1.06)        | -0.13                   | 0.018  |
| <i>Kidney disease-specific domains</i>                            |                              |                         |        |
| <b><i>Symptoms</i></b>                                            |                              |                         |        |

|                                      |                        |        |       |
|--------------------------------------|------------------------|--------|-------|
| Unadjusted                           | -4.98 (-9.52, -0.45)   | -0.12  | 0.031 |
| Multivariable-adjusted <sup>9</sup>  | -5.11 (-9.61, -0.62)   | -0.12  | 0.026 |
| <i>Effects of kidney disease</i>     |                        |        |       |
| Unadjusted                           | -4.07 (-8.87, 0.73)    | -0.09  | 0.10  |
| Multivariable-adjusted <sup>10</sup> | -2.87 (-7.82, 2.08)    | -0.07  | 0.26  |
| <i>Burden of kidney disease</i>      |                        |        |       |
| Unadjusted                           | -0.53 (-5.49, 4.42)    | -0.01  | 0.83  |
| Multivariable-adjusted <sup>11</sup> | -1.13 (-6.16, 3.90)    | -0.03  | 0.66  |
| <i>Work status</i>                   |                        |        |       |
| Unadjusted                           | -13.24 (-21.82, -4.66) | -0.17  | 0.003 |
| Multivariable-adjusted <sup>12</sup> | -10.02 (-18.87, -1.17) | -0.17  | 0.027 |
| <i>Cognitive function*</i>           |                        |        |       |
| Unadjusted                           | -1.41 (-6.32, 3.49)    | -0.03  | 0.57  |
| <i>Quality of social interaction</i> |                        |        |       |
| Unadjusted                           | -0.20 (-5.28, 4.87)    | -0.004 | 0.94  |
| Multivariable-adjusted <sup>13</sup> | -2.87 (-7.82, 2.08)    | -0.07  | 0.26  |
| <i>Sleep</i>                         |                        |        |       |
| Unadjusted                           | 2.40 (-2.29, 7.09)     | 0.06   | 0.32  |
| Multivariable-adjusted <sup>14</sup> | 1.06 (-3.78, 5.90)     | 0.02   | 0.67  |
| <i>Social support*</i>               |                        |        |       |
| Unadjusted                           | -2.56 (-8.09, 2.97)    | -0.05  | 0.36  |
| <i>Dialysis staff encouragement</i>  |                        |        |       |
| Unadjusted                           | -2.53 (-8.20, 3.14)    | -0.05  | 0.38  |
| Multivariable-adjusted <sup>15</sup> | -1.28 (-7.01, 4.44)    | -0.02  | 0.66  |
| <i>Patient satisfaction*</i>         |                        |        |       |
| Unadjusted                           | -1.25 (-6.05, 3.55)    | -0.03  | 0.61  |

1, adjusted for geriatric nutritional risk index (GNRI); 2, C-reactive protein and GNRI; 3, dialysis vintage; 4, age; 5, GNRI; 6, serum albumin; 7, GNRI; 8, no other variables; 9, gender and diabetes mellitus; 10, serum albumin; 11, gender, diabetes mellitus, and C-reactive protein; 12, diabetes mellitus and GNRI; 13, age; 14, age, gender, and diabetes mellitus; 15, dialysis vintage  
 \*No explanatory variables that showed a significant relationship ( $P < 0.05$ ) with these QOL domains
