# Supplementary material for: Associations between N-Terminal Pro-B-Type Natriuretic Peptide, Body Fluid Imbalance and Quality of Life in Patients Undergoing Hemodialysis: A Cross-Sectional Study
Source: MDPI journal article supplement (doi:10.3390/jcm12237356), 2023-11-28
Supplement: s1 [file s1]

**Supplemental Table 2.** Body fluid composition in women according to the pre-hemodialysis

NT-proBNP quartiles

| Body fluid composition                           | NT-proBNP, pg/mL                   |                                     |                                     |                                       | <i>P</i> |
|--------------------------------------------------|------------------------------------|-------------------------------------|-------------------------------------|---------------------------------------|----------|
|                                                  | Quartile 1<br>172–1700<br>(n = 17) | Quartile 2<br>1720–3410<br>(n = 29) | Quartile 3<br>3430–7170<br>(n = 32) | Quartile 4<br>7200–69,000<br>(n = 17) |          |
| Body weight, kg                                  | 58.1<br>(47.1–64.8)                | 48.4<br>(43.7–54.3)                 | 48.1<br>(43.6–54.6)                 | 46.7<br>(41.0–55.3)                   | 0.39     |
| Body surface area, m <sup>2</sup>                | 1.58<br>(1.42–1.63)                | 1.43<br>(1.36–1.48)                 | 1.45<br>(1.35–1.54)                 | 1.42<br>(1.31–1.51)                   | 0.53     |
| Total body water, l                              | 27.1<br>(24.6–29.2)                | 25.1<br>(23.7–26.9)                 | 26.1<br>(23.4–28.5)                 | 24.3<br>(22.2–27.1)                   | 0.48     |
| Total body water, l per BSA                      | 17.6<br>(16.6–18.8)                | 17.9<br>(17.2–18.5)                 | 18.2<br>(17.0–19.0)                 | 17.4<br>(15.9–18.8)                   | 0.77     |
| Intracellular water, l                           | 16.5<br>(15.1–18.1)                | 15.3<br>(14.3–16.6)                 | 15.7<br>(14.3–17.5)                 | 14.4<br>(13.1–16.6)                   | 0.29     |
| Intracellular water, l per BSA                   | 10.6<br>(10.2–11.6)                | 11.0<br>(10.3–11.3)                 | 11.0<br>(10.4–11.6)                 | 10.5<br>(9.5–11.3)                    | 0.33     |
| Extracellular water, l                           | 10.6<br>(9.4–11.4)                 | 9.8<br>(9.4–10.5)                   | 10.5<br>(9.3–11.3)                  | 9.9<br>(9.0–10.7)                     | 0.93     |
| Extracellular water, l per BSA                   | 6.8<br>(6.5–7.1)                   | 7.0<br>(6.6–7.3)                    | 7.2<br>(6.7–7.5)                    | 6.9<br>(6.4–7.6)                      | 0.43     |
| Extracellular water to Intracellular water ratio | 0.64<br>(0.61–0.65)                | 0.63<br>(0.62–0.66)                 | 0.65<br>(0.64–0.67)                 | 0.67<br>(0.66–0.69)                   | 0.003    |
| Protein, kg                                      | 7.1<br>(6.5–7.8)                   | 6.6<br>(6.2–7.2)                    | 6.8<br>(6.2–7.5)                    | 6.2<br>(5.7–7.2)                      | 0.27     |
| %Protein, %                                      | 12.2<br>(11.7–13.8)                | 13.6<br>(12.2–14.9)                 | 14.2<br>(12.6–15.6)                 | 13.7<br>(11.9–15.2)                   | 0.71     |
| Mineral, kg                                      | 2.54<br>(2.23–2.76)                | 2.50<br>(2.29–2.62)                 | 2.59<br>(2.38–2.79)                 | 2.40<br>(2.27–2.65)                   | 0.71     |
| %Mineral, %                                      | 4.5<br>(4.1–5.2)                   | 5.0<br>(4.5–5.6)                    | 5.4<br>(4.9–6.0)                    | 5.3<br>(4.3–6.2)                      | 0.09     |
| Fat, kg                                          | 21.2<br>(14.2–26.1)                | 14.7<br>(10.1–19.7)                 | 11.8<br>(9.2–17.8)                  | 12.9<br>(7.9–21.0)                    | 0.50     |
| %Fat, %                                          | 36.9<br>(28.2–40.1)                | 28.9<br>(22.7–37.5)                 | 25.4<br>(20.1–34.8)                 | 28.4<br>(18.5–38.3)                   | 0.39     |
| Free fat mass, kg                                | 36.9<br>(33.4–39.6)                | 34.0<br>(32.1–36.9)                 | 35.4<br>(31.8–38.6)                 | 33.2<br>(30.1–36.9)                   | 0.13     |

|                                                  |                     |                     |                     |                     |        |
|--------------------------------------------------|---------------------|---------------------|---------------------|---------------------|--------|
| Free fat mass, %                                 | 63.1<br>(60.0–71.8) | 71.1<br>(62.5–77.3) | 74.6<br>(65.2–79.9) | 71.6<br>(61.7–81.5) | 0.034  |
| Body cell mass, kg                               | 24.0<br>(21.1–26.4) | 21.9<br>(20.4–23.4) | 22.3<br>(20.7–24.4) | 20.1<br>(18.3–21.6) | 0.014  |
| Body cell mass, %                                | 41.3<br>(39.1–45.5) | 46.2<br>(40.7–49.7) | 48.4<br>(44.0–51.4) | 46.5<br>(38.5–49.9) | 0.09   |
| Phase angle                                      | 5.1<br>(4.8–6.2)    | 5.1<br>(4.6–5.4)    | 4.8<br>(4.3–5.1)    | 4.0<br>(3.4–4.3)    | <0.001 |
| Skeletal muscle<br>mass index, kg/m <sup>2</sup> | 6.4<br>(5.5–7.4)    | 6.0<br>(5.5–6.4)    | 6.0<br>(5.5–6.6)    | 5.3<br>(4.9–6.2)    | 0.048  |
