# Supplementary material for: Associations between N-Terminal Pro-B-Type Natriuretic Peptide, Body Fluid Imbalance and Quality of Life in Patients Undergoing Hemodialysis: A Cross-Sectional Study
Source: MDPI journal article supplement (doi:10.3390/jcm12237356), 2023-11-28
Supplement: s1 [file s1]

**Supplemental Table 1.** Body fluid composition in men according to pre-hemodialysis NT-proBNP quartiles

| Body fluid composition                           | NT-proBNP, pg/mL                   |                                      |                                      |                                       | <i>P</i> |
|--------------------------------------------------|------------------------------------|--------------------------------------|--------------------------------------|---------------------------------------|----------|
|                                                  | Quartile 1<br>172–1700<br>(n = 63) | Quartile 2<br>1720–3,410<br>(n = 52) | Quartile 3<br>3430–7,170<br>(n = 49) | Quartile 4<br>7200–69,000<br>(n = 63) |          |
| Body weight, kg                                  | 69.2<br>(58.0–80.0)                | 65.7<br>(57.4–71.1)                  | 62.0<br>(55.7–72.6)                  | 58.6<br>(52.0–66.0)                   | <0.001   |
| Body surface area, m <sup>2</sup>                | 1.79<br>(1.67–1.97)                | 1.75<br>(1.65–1.84)                  | 1.69<br>(1.59–1.83)                  | 1.66<br>(1.56–1.77)                   | <0.001   |
| Total body water, l                              | 36.9<br>(33.4–42.8)                | 35.9<br>(33.7–40.4)                  | 34.4<br>(31.5–40.4)                  | 33.7<br>(31.2–37.2)                   | 0.002    |
| Total body water, l per BSA                      | 21.0<br>(19.5–22.4)                | 21.1<br>(19.8–21.9)                  | 20.6<br>(19.3–22.0)                  | 20.3<br>(19.4–21.8)                   | 0.41     |
| Intracellular water, l                           | 23.4<br>(20.3–26.9)                | 22.1<br>(20.9–25.1)                  | 21.3<br>(18.8–22.9)                  | 20.4<br>(18.7–22.9)                   | <0.001   |
| Intracellular water, l per BSA                   | 13.0<br>(12.2–14.0)                | 13.0<br>(12.3–13.4)                  | 12.5<br>(11.8–12.5)                  | 12.2<br>(11.6–13.3)                   | 0.014    |
| Extracellular water, l                           | 14.3<br>(12.9–16.5)                | 13.9<br>(12.8–15.3)                  | 13.3<br>(12.3–15.5)                  | 13.5<br>(12.5–14.7)                   | 0.10     |
| Extracellular water, l per BSA                   | 8.0<br>(7.4–8.5)                   | 8.1<br>(7.6–8.5)                     | 7.0<br>(7.4–8.6)                     | 8.0<br>(7.7–8.5)                      | 0.041    |
| Extracellular water to Intracellular water ratio | 0.64<br>(0.61–0.65)                | 0.63<br>(0.62–0.66)                  | 0.65<br>(0.64–0.67)                  | 0.67<br>(0.66–0.69)                   | 0.003    |
| Protein, kg                                      | 10.1<br>(8.8–11.6)                 | 9.5<br>(9.0–10.9)                    | 9.2<br>(8.1–10.7)                    | 8.8<br>(8.0–9.9)                      | <0.001   |
| %Protein, %                                      | 14.5<br>(13.6–15.8)                | 15.1<br>(13.8–15.8)                  | 14.8<br>(13.6–16.2)                  | 14.9<br>(13.9–16.1)                   | 0.09     |
| Mineral, kg                                      | 3.38<br>(2.92–3.93)                | 3.29<br>(3.02–3.66)                  | 3.27<br>(2.77–3.65)                  | 3.04<br>(2.81–3.43)                   | 0.003    |
| %Mineral, %                                      | 5.0<br>(4.6–5.4)                   | 5.0<br>(4.7–5.5)                     | 4.9<br>(4.5–5.8)                     | 5.2<br>(4.8–5.6)                      | 0.007    |
| Fat, kg                                          | 18.5<br>(12.0–23.3)                | 16.0<br>(11.1–21.0)                  | 14.4<br>(10.2–21.0)                  | 12.8<br>(9.4–17.7)                    | <0.001   |
| %Fat, %                                          | 26.7<br>(19.1–30.8)                | 23.5<br>(18.6–29.7)                  | 24.3<br>(16.8–30.7)                  | 22.7<br>(16.8–28.2)                   | 0.004    |
| Free fat mass, kg                                | 50.5<br>(45.0–58.5)                | 48.8<br>(45.9–54.8)                  | 46.4<br>(42.5–54.6)                  | 45.6<br>(42.1–50.7)                   | 0.005    |

|                                                  |                     |                     |                     |                     |        |
|--------------------------------------------------|---------------------|---------------------|---------------------|---------------------|--------|
| Free fat mass, %                                 | 73.2<br>(69.2–80.9) | 76.5<br>(70.4–81.4) | 75.7<br>(69.3–83.2) | 77.3<br>(71.8–83.2) | 0.16   |
| Body cell mass, kg                               | 32.4<br>(29.1–38.6) | 31.8<br>(30.0–35.8) | 30.5<br>(27.0–35.6) | 29.6<br>(26.6–33.1) | 0.006  |
| Body cell mass, %                                | 48.4<br>(45.9–52.2) | 50.3<br>(45.9–52.5) | 48.7<br>(44.9–54.4) | 49.7<br>(46.0–53.6) | 0.82   |
| Phase angle                                      | 6.1<br>(5.3–6.9)    | 5.8<br>(5.0–6.4)    | 5.3<br>(4.5–6.1)    | 4.7<br>(4.0–5.4)    | <0.001 |
| Skeletal muscle<br>mass index, kg/m <sup>2</sup> | 7.6<br>(7.2–8.7)    | 7.6<br>(7.1–8.3)    | 7.4<br>(6.7–8.3)    | 7.2<br>(6.3–8.0)    | 0.003  |
